# Supplementary material
Source: Preprints.org preprint supplement (doi:10.20944/preprints202404.1511.v1)
Supplement: Supplementary file 1 [file Table 1.docx]

Table 1: Colonization of colon by *Klebsiella pneumoniae*versus other Enterobacteria including the normal colon resident enterobacterium *Escherichia coli* as well as *Acinetobacter baumannii* (a Non-Enterobacteriaceae bacterium) in antibiotics intravenously treated preterm neonates.

|  | **Preterm Neonates subject #** | **Age**  **days** | **Gestational age (Weeks)** | **Types of antibiotics**  **Treated with** | **Bacterial strains Colonizing Preterm Neonates Colon** | **Accession number** |
| --- | --- | --- | --- | --- | --- | --- |
| 1 st week | Case 3 | 2 | 31 | Ampicillin 50mg/ivq12h  Cefotaxim50mg ivq12/h | ND | - |
| Case 4 1st time | 5 | 32 | Gentamicin  Ampicillin50mg/iv/q12h | ND | - |
| Case 5 1st time | 6 | 32 | Gentamicin  Ampicillin50mg/iv/q12h | ND | - |
| Case 9 | 2 | 30 | Merobenem80mg q12h/iv  Cefotaxime 80mg ivq12h | ND | - |
| Case 18 | 3 | 33 | Ampicillin 90Mg iv q 12h  Gentamicin 8Mg iv q 36h | ND | - |
| Case 19 | 5 | 26 | Ampicillin 12Mg iv q 12h  CEFOTAXIME --Mg iv q 48h | ND | - |
| > 1 week | Case 6 1st time | 8 | 28 | Ampicillin50mg/iv/q12h  Cefotaxim50mg/iv/q12h | ND | - |
| Case 1 | 22 | 27 | Vancomycin10mg/ivq36h | *Escherichia coli* EFTU1 | PP156718 |
| Case 2 | 18 | 25 | Ampicillin 50mg/ivq12h  Cefotaxim50mg ivq12/h  Fucanazol13mg/ivq12 | ***Klebsiella pneumoniae*** EFTU101 | PP157088 |
| Case 4  2nd time | 15 | 32 | Stop AB before 5 days | *E. coli* EFTU2 | PP157624 |
| Case 5 2nd time | 16 | 33 | Gentamicin  Ampicillin50mg/iv/q12h | ***Klebsiella pneumoniae*** EFTU102 | PP177257 |
| Case 6 2nd time | 18 | 28 | Ampicillin50mg/iv/q12h  Cefotaxim50mg/iv/q12h | *Klebsiella pneumoniae*  EFTU103 | PP177305 |
| Case 7 | 44 | 26 | Vancomycin 10mg q12h/iv  Merobenem20mg q12h/iv | *Klebsiella pneumoniae* EFTU104 | PP177307 |
| Case 8 | 44 | 26 | Vancomycin 10mg q12h/iv  Merobenem20mg q12h/iv | *Klebsiella pneumoniae* EFTU105 | PP177367 |
| Case 10 | 44 | 29 | He was taking vancomycin 15mg iv q 12 h and stopping before 18day | *Klebsiella pneumoniae* EFTU3 | PP157908 |
| Case 11 | 24 | 31 | No antibiotic | *Escherichia coli* EFTU4 | PP182268 |
| Case 13 | 21 | 25 | Merobenem27mg q12h  Colitin45mg q12h/iv | *Escherichia coli* EFTU5 | PP187030 |
| Case 14 | 16 | 33 | Gentamicin8mgivq36h  Ampicillin76mg/iv/q12h | *Klebsiella pneumoniae* EFTU110 | PP177465 |
| Case 15 | 46 | 27 | Vancomycin 10mg q8h/iv  Merobenem20mg q8h/iv | *Escherichia coli* EFTU6 | PP187981 |
| *Klebsiella pneumoniae* EFTU113 | PP204007 |
| *Acinetobacter baumannii* EFTU111 | PP177550 |
| Case 16 | 29 | 29 | Ampicillin 65Mg iv q 12h  Gentamicin 65Mg iv q 48h | *Acinetobacter baumannii* EFTU114 | PP177613 |
| Case 17 | 32 | 29 | Ampicillin 60Mg iv q 12h  CEFOTAXIME 60Mg iv q 48h | *Escherichia coli* EFTU7 | PP188038 |
| *Klebsiella quasipneumoniae* EFTU115 | PP177908 |
| Case 20 | 64 | 31 | meropenem 50Mg iv q 8h  Colistin 50Mg iv q 8h | *Escherichia coli* EFTU8 | PP188042 |
| *Klebsiella pneumoniae* EFTU116 | PP177909 |
| Case 21 | 14 | 31 | AMPCILLIN 67MGiv q 12h  Gentamicin 6,7Mg iv q 36h  stopping before six day | *Escherichia coli* EFTU9 | PP188096 |

ND, Not Detected
